# Supplementary material for: Chronic Childhood Peer Rejection is Associated with Heightened Neural Responses to Social Exclusion During Adolescence
Source: Springer Nature journal article supplement (doi:10.1007/s10802-015-9983-0), 2015-03-10
Supplement: MOESM1 [file 543052]

## Supplementary Table 1

*Assessment of Need Satisfaction and Mood following Inclusion, Exclusion and 30 minutes after exclusion (when participants came out of the scanner). All items were rated on a scale from 1 ('not at all') to 5 ('very much'). (R) = reversed scored.*

| Construct                   | Item                                                                                                                                         |
|-----------------------------|----------------------------------------------------------------------------------------------------------------------------------------------|
| <b>Need satisfaction</b>    |                                                                                                                                              |
| <i>Belonging</i>            | 1. I had the feeling that I belonged to the group during the game.<br>2. During the game I felt connected with one or more players.          |
| <i>Control</i>              | 3. I had the feeling that the other players decided everything. (R)<br>4. I felt in control over the game.                                   |
| <i>Self esteem</i>          | 5. I felt good about myself.<br>6. My self-esteem was high.                                                                                  |
| <i>Meaningful existence</i> | 7. During the game it felt as if my presence was not meaningful. (R)<br>8. I had the feeling that my presence during the game was important. |
| <b>Mood</b>                 |                                                                                                                                              |
|                             | During the game I felt:                                                                                                                      |
|                             | 1. Good                                                                                                                                      |
|                             | 2. Bad (R)                                                                                                                                   |
|                             | 3. Happy                                                                                                                                     |
|                             | 4. Sad (R)                                                                                                                                   |
|                             | 5. Relaxed                                                                                                                                   |
|                             | 6. Tense (R)                                                                                                                                 |
|                             | 7. Friendly                                                                                                                                  |
|                             | 8. Unfriendly (R)                                                                                                                            |
